# Supplementary material
Source: PubMed Central journal article supplement (PMC1975844)
Supplement: blood_blood-2006-09-045369_1.pdf [file blood_blood-2006-09-045369_1.pdf]

Yvan Samson MD, Centre Hospitalier Universitaire de Quebec, Quebec City, QC,  
Canada

Craig Hurwitz, MD Maine Children's Cancer Program, Scarborough, ME

Ronald Barr MD, McMaster University, Hamilton, ON, Canada

Albert Moghrabi MD, Sainte-Justine Hospital, University of Montreal, Montreal, QC,  
Canada

Luis Clavell MD, San Jorge Children's Hospital, San Juan, Puerto Rico

Marshall Schorin MD, Tulane Hospital for Children, New Orleans, LA

Barbara Asselin MD, University of Rochester Medical Center, Rochester, NY

Lewis Silverman MD, Dana-Farber Cancer Institute/Children's Hospital, Boston, MA
